# Supplementary material
Source: PubMed Central journal article supplement (PMC5549681)
Supplement: NIHMS881573-supplement-2.pdf [file NIHMS881573-supplement-2.pdf]

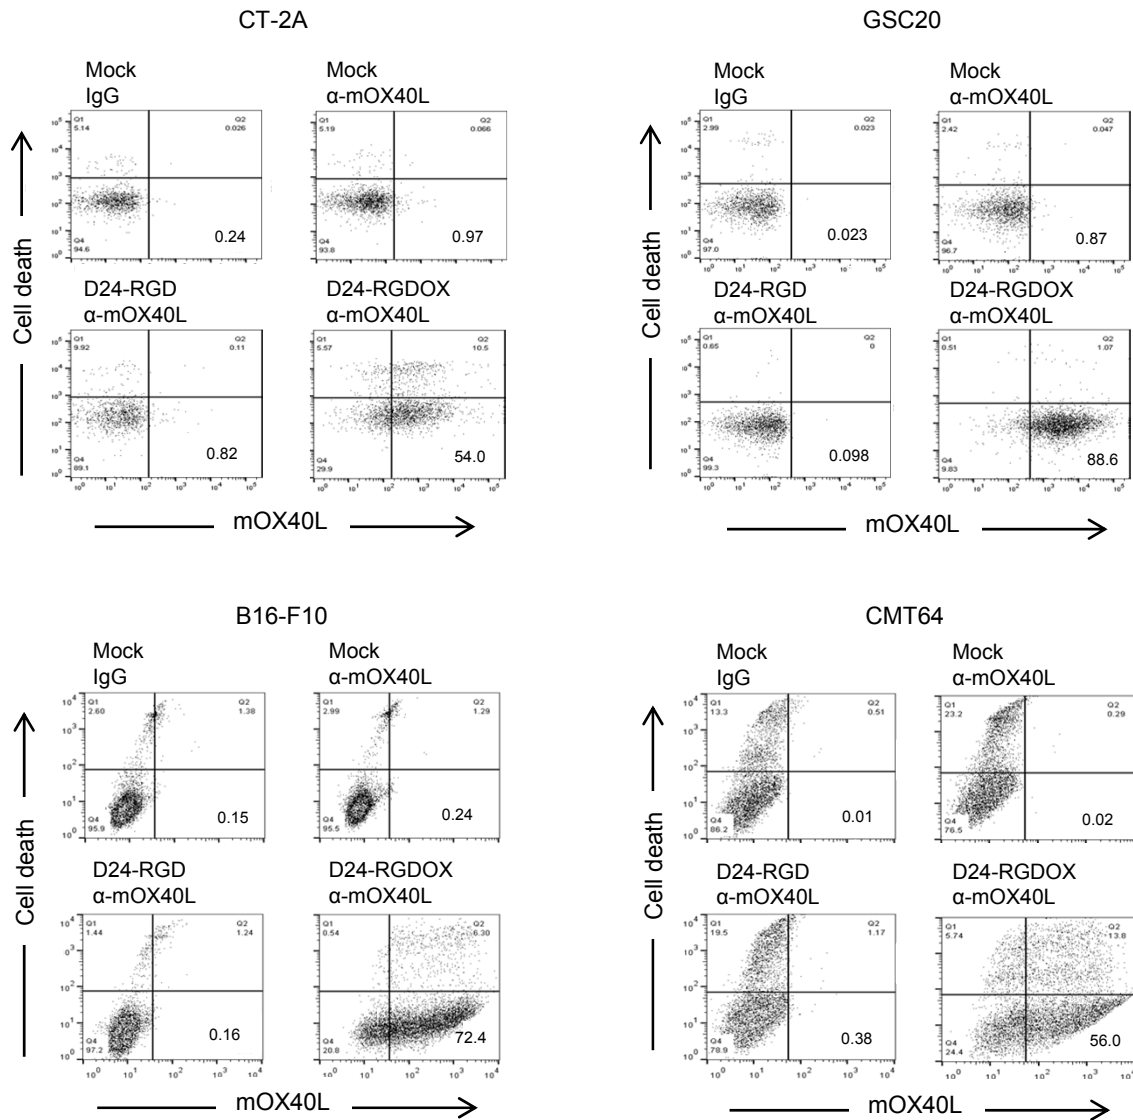

**Figure S1. Expression of mOX40L by Delta-24-RGDOX.** Cells were infected with the indicated viruses (50 pfu/cell for CT-2A and B16, 20 pfu/cell for GSC20, 25 pfu/cell for CMT64). Forty-eight hours later, the cells were stained with anti-mOX40L-APC or anti-mOX40L antibody and then an FITC-labeled secondary goat anti-rat IgG antibody. The cell membrane disruption (cell death) was monitored using ethidium homodimer-1 staining. The stained cells were analyzed using flow cytometry. The numbers at the lower right corners are the percentages of the cells expressing mOX40L. Shown are representative results from two experiments. D24-RGD: Delta-24-RGD; D24-RGDOX: Delta-24-RGDOX.
