# Supplementary material
Source: PubMed Central journal article supplement (PMC5549681)
Supplement: NIHMS881573-supplement-3.pdf [file NIHMS881573-supplement-3.pdf]

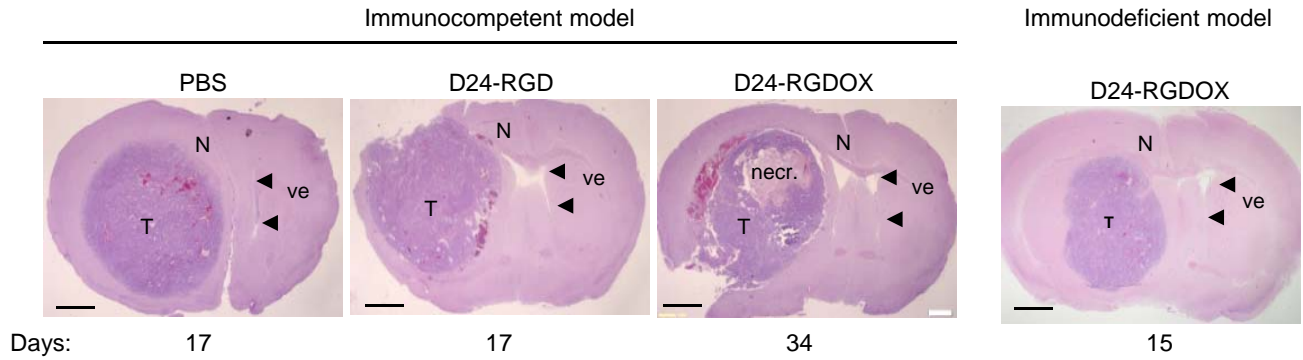

**Figure S2. Delta-24-RGDOX-induced necrosis (necr.) in the gliomas from C57BL/6 mice.** Shown are representative hematoxylin and eosin-stained, whole-mount coronal sections of the brains from at least 6 mice from each group in Figure 5B. The numbers at the bottom indicate how many days after tumor implantation the mice were sacrificed. T: tumor; N: normal brain tissue; ve: lateral ventricle (arrowheads). Scale: 1 mm.
