# Supplementary material
Source: PubMed Central journal article supplement (PMC5549681)
Supplement: NIHMS881573-supplement-4.pdf [file NIHMS881573-supplement-4.pdf]

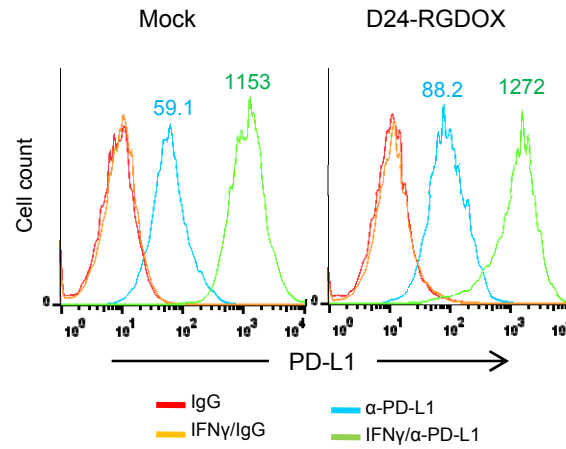

**Figure S3. PD-L1 expression in mouse glioma GL261-EGFP cells.** Cells were mock-infected or infected with D24-RGDOX (100 PFU/cell) in the presence or absence of mouse IFN $\gamma$  (100 units/ml) for 48 hours and then analyzed with flow cytometry for PD-L1 expression. The colored numbers indicate the MFI for the curve of the same color.
